# Supplementary material
Source: PubMed Central journal article supplement (PMC4188134)
Supplement: mmc4.pdf [file mmc4.pdf]

## Lungs

*Cyp27a1<sup>+/+</sup>Cyp46a1<sup>+/+</sup>*

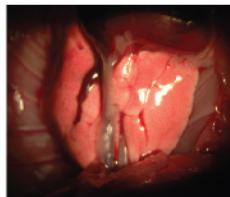

*Cyp27a1<sup>-/-</sup>Cyp46a1<sup>-/-</sup>*

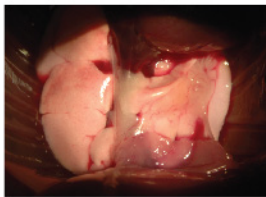

## Brown adipose tissue

*Cyp27a1<sup>+/+</sup>Cyp46a1<sup>+/+</sup>*

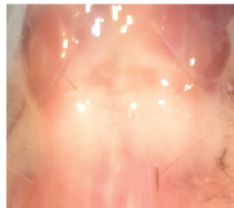

*Cyp27a1<sup>-/-</sup>Cyp46a1<sup>-/-</sup>*

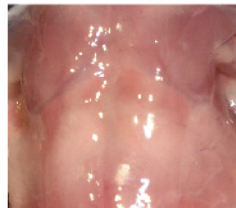

## Liver

*Cyp27a1<sup>+/+</sup>Cyp46a1<sup>+/+</sup>*

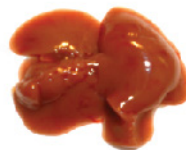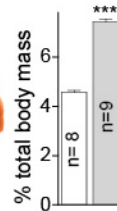

*Cyp27a1<sup>-/-</sup>Cyp46a1<sup>-/-</sup>*

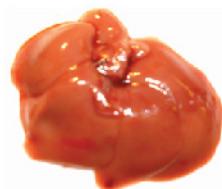

## Spleen

*Cyp27a1<sup>+/+</sup>Cyp46a1<sup>+/+</sup>*

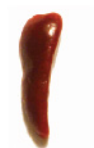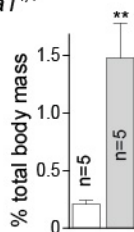

*Cyp27a1<sup>-/-</sup>Cyp46a1<sup>-/-</sup>*

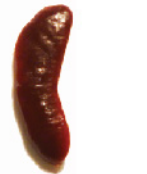

Supplemental Figure S4
