# Supplementary material
Source: PubMed Central journal article supplement (PMC4188134)

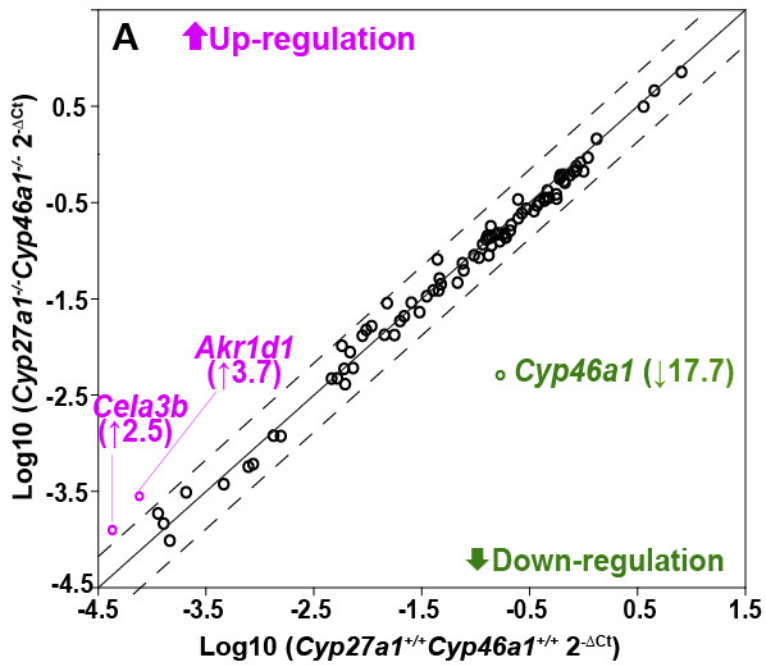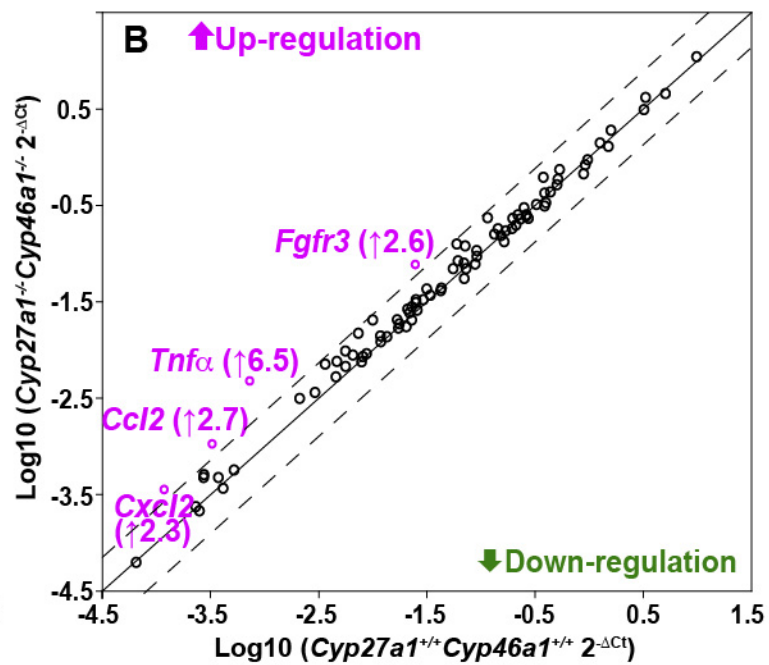

Supplemental Figure S1.

Supplement: mmc1.pdf [file mmc1.pdf]

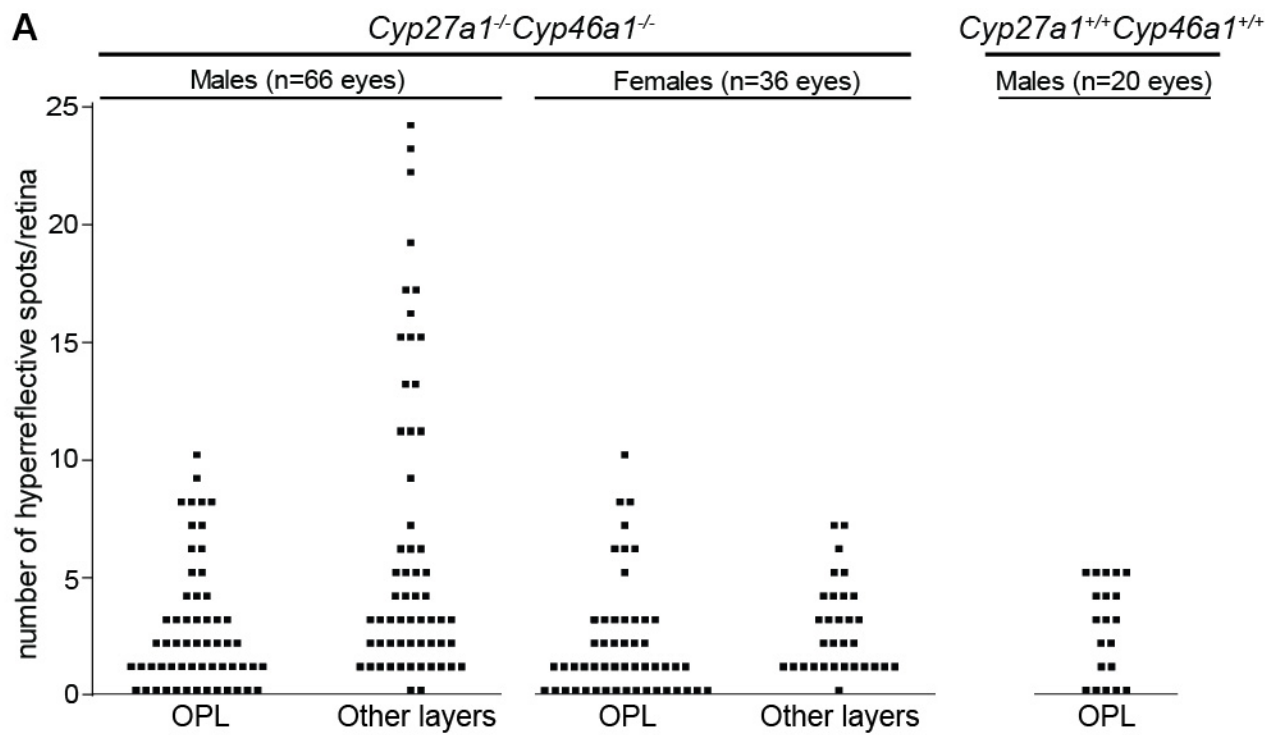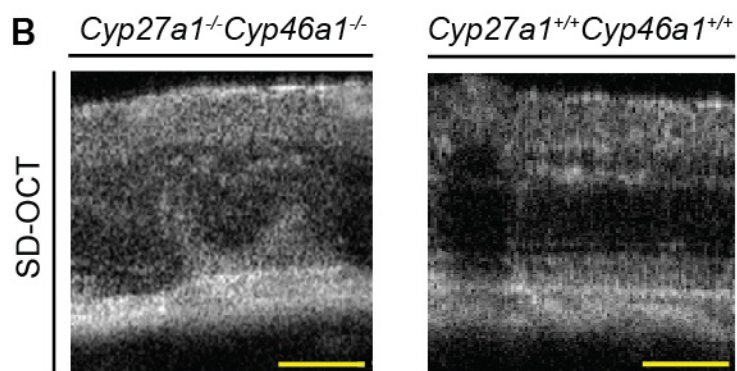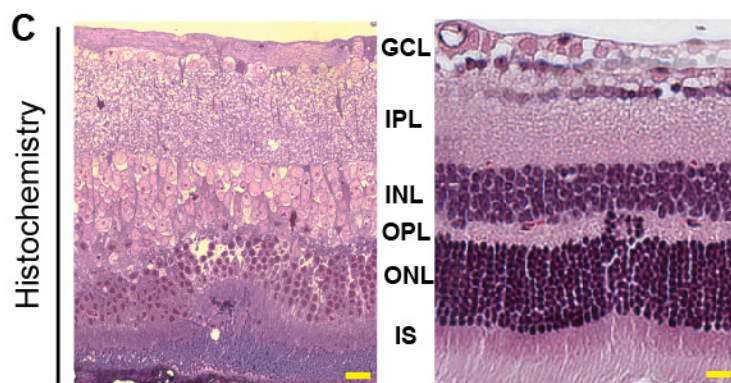

Supplemental Figure S2.

Supplement: mmc2.pdf [file mmc2.pdf]

▲ *Cyp27a<sup>+/+</sup>Cyp46a1<sup>+/+</sup>*    △ *Cyp27a<sup>-/-</sup>Cyp46a1<sup>-/-</sup>*

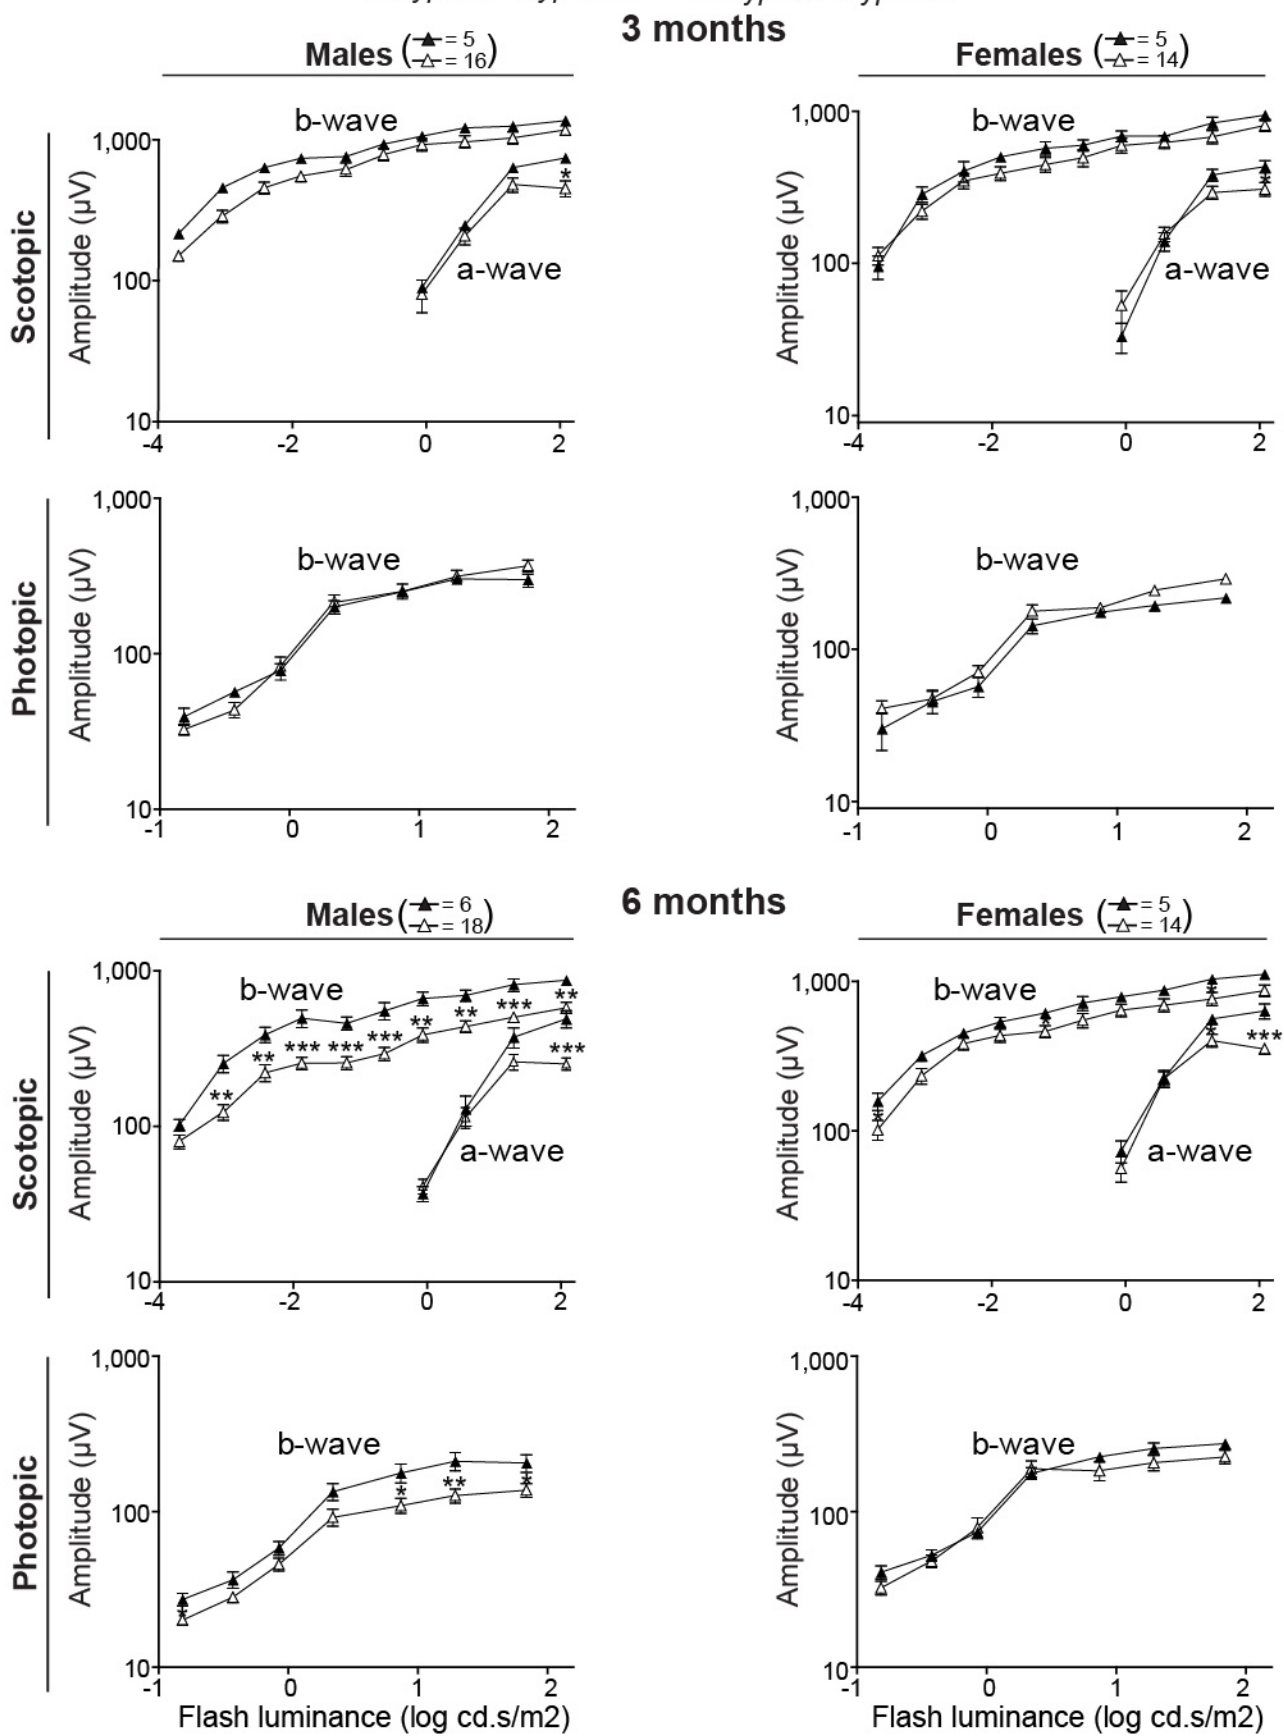

Supplemental Figure S3.

Supplement: mmc3.pdf [file mmc3.pdf]
